# Supplementary material for: Chaotic itinerancy within the coupled dynamics between a physical body and neural oscillator networks
Source: PLoS One. 2017 Aug 10;12(8):e0182518. doi: 10.1371/journal.pone.0182518 (PMC5552128; doi:10.1371/journal.pone.0182518)
Supplement: S5 File — (XLSX) [file pone.0182518.s012.xlsx]

## Sheet: Sheet2
Duration	71	50	149.5	66.5	90.5	54	139.5	33.5	42	86	42	50	37.5	40.5	200	137	72	331.5	43	40.5	61	41.5	106.5	42	162.5	66.5	44.5	171	98.5	135	68	116	94.5	61	184	51	40	142.5	133.5	87.5	60.5	41	59	148.5	175	73.5	59	72	137
Average clustering coefficient	0.0791992	0.101693	0.0476609	0.0796305	0.0653706	0.103888	0.053426	0.116661	0.123963	0.0663854	0.0977438	0.10292	0.107931	0.0996814	0.0404195	0.0448997	0.0734721	0.0237123	0.105086	0.102495	0.0945593	0.0988046	0.0574819	0.0991055	0.0448302	0.0868054	0.0996794	0.0444361	0.0607181	0.0449992	0.0831319	0.0669459	0.0672287	0.0812155	0.0382731	0.103451	0.101749	0.0592079	0.0627819	0.0701221	0.0889531	0.100552	0.0896437	0.0505194	0.0389438	0.0755078	0.0920736	0.080903	0.0655473
Average shortest path length	10.4583	9.84453	15.8786	10.9659	12.3627	10.1638	14.6027	8.15711	8.60331	11.8299	8.84639	9.47362	8.69005	8.6355	16.5552	14.4092	11.001	23.8405	10.0216	8.7896	10.2545	8.75775	12.6598	9.79192	15.8616	11.585	9.14842	16.0717	12.8118	15.4781	10.8793	13.1305	12.1927	11.2196	16.7321	9.3859	8.66259	14.0398	12.4494	12.1585	10.23	8.43005	9.76713	15.0681	16.6665	11.6485	9.86831	10.7267	12.3666
Average transfer entropy (Hidden to Interface neuron)	0.0862226	0.0958226	0.041783	0.0639724	0.0474945	0.0629414	0.0434428	0.0722273	0.0549923	0.0624461	0.0795474	0.0810488	0.0436681	0.0908824	0.0253933	0.0428393	0.0759244	0.0251933	0.0196857	0.0848507	0.0720278	0.0912759	0.0570339	0.0321891	0.0432135	0.0240333	0.0877305	0.0409998	0.04803	0.0332347	0.0627189	0.0484692	0.0508758	0.0370687	0.0296045	0.0957756	0.0748502	0.03372	0.0590506	0.0537358	0.0795024	0.0951494	0.0705545	0.0414176	0.0469173	0.0689632	0.0818368	0.0807664	0.0679283
[truncated: 951 more columns]
